# Supplementary material for: Genome-Wide Association of the Laboratory-Based Nicotine Metabolite Ratio in Three Ancestries
Source: PubMed Central journal article supplement — Nicotine Tob Res. 2016 Apr 25;18(9):1837–44. doi: 10.1093/ntr/ntw117 (PMC4978985; doi:10.1093/ntr/ntw117), 2016-04-25
Supplement: supp_ntw117_SupplementaryTable1.pdf [file supp_ntw117_SupplementaryTable1.pdf]

| Chr | BP       | SNP        | REF | ALT | Imputation Quality | Genotype  | Genotype   | Eur Freq    | Eur Beta   | Eur SE    | Eur P      | As Freq     | As Beta    | As SE      | As P       | AFA Freq    | AFA Beta   | AFA SE     | AFA P       | Meta Beta  | Meta SE  | Meta P |
|-----|----------|------------|-----|-----|--------------------|-----------|------------|-------------|------------|-----------|------------|-------------|------------|------------|------------|-------------|------------|------------|-------------|------------|----------|--------|
| 19  | 41339896 | rs14339896 | T   | C   | 0.95654            | Genotyped | 0.31842453 | -0.31320506 | 0.05241822 | 1.02E-08  | 0.52138235 | -0.40013871 | 0.09385164 | 0.00011151 | 0.13077551 | -0.58396982 | 0.11167074 | 5.69E-06   | -0.36983836 | 0.04234602 | 2.46E-18 |        |
| 19  | 41340321 | rs14340321 | T   | C   | 0.94834            | Genotyped | 0.31879459 | -0.31429469 | 0.05223066 | 8.1E-10   | 0.51347059 | -0.40023979 | 0.0948293  | 0.00012768 | 0.30547959 | -0.59145573 | 0.11377771 | 6.28E-06   | -0.37080865 | 0.04244834 | 8.82E-18 |        |
| 19  | 41340317 | rs14340317 | T   | C   | 0.97637            | Genotyped | 0.31829953 | -0.32663372 | 0.05499994 | 1.8E-10   | 0.57840196 | -0.35670211 | 0.08611209 | 0.00016248 | 0.49282653 | -0.40156717 | 0.10667949 | 0.00052205 | -0.3458377  | 0.03985199 | 6.61E-18 |        |
| 19  | 41340983 | rs14340983 | T   | C   | 0.94423            | Genotyped | 0.31959096 | -0.31428977 | 0.05165643 | 0.94E-08  | 0.50921257 | -0.39167639 | 0.0951672  | 0.00019084 | 0.2956327  | -0.58617459 | 0.11747459 | 1.22E-05   | -0.31699729 | 0.04399272 | 7.58E-18 |        |
| 19  | 41353849 | rs14353849 | T   | C   | 0.89433            | Genotyped | 0.3963467  | -0.31672591 | 0.04815464 | 3.98E-10  | 0.55135294 | -0.38117427 | 0.09305236 | 0.000186   | 0.59571429 | -0.38868812 | 0.13396102 | 0.00011336 | -0.33577444 | 0.04074143 | 1.70E-16 |        |
| 19  | 41343150 | rs14343150 | T   | G   | 0.93439            | Genotyped | 0.36349057 | -0.30812935 | 0.04979931 | 3.32E-08  | 0.51865686 | -0.38480551 | 0.09333403 | 0.00017251 | 0.3495102  | -0.48723447 | 0.13354004 | 0.00051049 | -0.34152278 | 0.04165452 | 2.43E-16 |        |
| 19  | 41341589 | rs14341589 | T   | G   | 0.87993            | Genotyped | 0.3128184  | -0.3047313  | 0.05270628 | 2.76E-08  | 0.44832353 | -0.413461   | 0.1813805  | 0.00042495 | 0.26920408 | -0.58413784 | 0.12688086 | 4.95E-05   | -0.35732756 | 0.04457633 | 8.13E-16 |        |
| 19  | 41341229 | rs14341229 | T   | G   | 0.90839            | Genotyped | 0.29684906 | -0.28539709 | 0.05384858 | 3.10E-07  | 0.42951961 | -0.39335306 | 0.11066115 | 0.00153489 | 0.21407143 | -0.54635276 | 0.12538742 | 8.03E-05   | -0.3638537  | 0.04552154 | 1.46E-13 |        |
| 19  | 41354712 | rs14354712 | T   | G   | 0.85231            | Genotyped | 0.37286231 | -0.29459037 | 0.05078539 | 2.50E-08  | 0.48134314 | -0.3639976  | 0.10785535 | 0.00159891 | 0.56015306 | -0.35886329 | 0.15003832 | 0.0215812  | -0.31161882 | 0.04939179 | 1.31E-12 |        |
| 19  | 41374558 | rs14374558 | T   | CA  | 0.6654             | NA        | 0.4596613  | -0.31179913 | 0.05468553 | 4.14E-08  | 0.5714902  | -0.36558638 | 0.0522897  | 0.0012022  | 0.59992857 | -0.42710847 | 0.13733015 | 0.0181688  | -0.33097878 | 0.04677229 | 4.95E-12 |        |
| 19  | 41363098 | rs14363098 | T   | C   | 0.78055            | NA        | 0.33971945 | -0.31920961 | 0.05425451 | 1.67E-08  | 0.38219608 | -0.36974915 | 0.11002252 | 0.02864152 | 0.47697959 | -0.38215206 | 0.15679797 | 0.0334124  | -0.31699729 | 0.04709326 | 1.68E-17 |        |
| 19  | 41342459 | rs14342459 | T   | G   | 0.84417            | NA        | 0.42030896 | -0.28923859 | 0.05183483 | 4.99E-07  | 0.51221566 | -0.38509409 | 0.09477196 | 0.00020185 | 0.56693878 | -0.28370565 | 0.16623744 | 0.09564443 | -0.2925285  | 0.04386529 | 1.69E-11 |        |
| 19  | 41363301 | rs14363301 | T   | T   | 0.78045            | NA        | 0.31097877 | -0.31193236 | 0.05414791 | 3.07E-08  | 0.53921527 | -0.24057102 | 0.117903   | 0.0476286  | 0.42067347 | -0.33254338 | 0.14534242 | 0.02750006 | -0.30000304 | 0.04668003 | 8.09E-11 |        |
| 19  | 41348062 | rs14348062 | T   | C   | 0.98371            | NA        | 0.49062972 | -0.25070655 | 0.0489329  | 6.96E-07  | 0.56177451 | -0.37507132 | 0.08457497 | 6.51E-05   | 0.86388776 | -0.02716742 | 0.15558856 | 0.86226638 | -0.26423226 | 0.04068748 | 9.94E-11 |        |
| 19  | 41348054 | rs14348054 | T   | C   | 0.98723            | NA        | 0.49008491 | -0.25047313 | 0.04890368 | 7.02E-07  | 0.56075459 | -0.37421776 | 0.08444001 | 6.58E-05   | 0.86552041 | -0.02897839 | 0.15501684 | 0.86256493 | -0.2640338  | 0.04082528 | 9.97E-11 |        |
| 19  | 41347998 | rs14347998 | T   | C   | 0.97963            | Genotyped | 0.48629717 | -0.2477011  | 0.04881918 | 1.14E-07  | 0.55878431 | -0.37260714 | 0.08419315 | 6.71E-05   | 0.8831633  | -0.03095431 | 0.15055956 | 0.8381497  | -0.26105824 | 0.04071077 | 1.43E-10 |        |
| 19  | 41374900 | rs14374900 | T   | CTA | 0.52556            | NA        | 0.0861013  | -0.60253342 | 0.12187409 | 9.16E-06  | 0.16489216 | -0.50211594 | 0.1483385  | 0.00155365 | 0.18113265 | -0.46213466 | 0.139462   | 0.02171284 | -0.54292479 | 0.04867707 | 1.43E-10 |        |
| 19  | 41338712 | rs14338712 | T   | C   | 0.99978            | Genotyped | 0.37540802 | -0.22537056 | 0.04618531 | 2.14E-06  | 0.07941337 | 0.146840044 | 0.19569566 | 0.05716809 | 0.2236735  | 0.36261149  | 0.0954873  | 4.42E-05   | 0.36043504  | 0.0406461  | 1.80E-09 |        |
| 19  | 41372475 | rs14372475 | T   | G   | 0.9786             | Genotyped | 0.04932075 | -0.49314389 | 0.05957797 | 5.87E-07  | 0.17546708 | -0.38428161 | 0.12459911 | 0.0036915  | 0.16431633 | -0.3400462  | 0.1325987  | 0.02718435 | -0.41619615 | 0.06588305 | 2.66E-10 |        |
| 19  | 41354941 | rs14354941 | T   | G   | 0.73991            | NA        | 0.28955189 | -0.30893688 | 0.05900545 | 4.09E-07  | 0.4012549  | -0.36892963 | 0.12453055 | 0.00500534 | 0.32162651 | -0.32206884 | 0.16606652 | 0.06011673 | -0.32014374 | 0.0410701  | 2.90E-10 |        |
| 19  | 41354942 | rs14354942 | T   | G   | 0.73733            | NA        | 0.28856131 | -0.30770171 | 0.05911449 | 4.34E-07  | 0.39804902 | -0.36628622 | 0.12519443 | 0.00552302 | 0.31428571 | -0.32136832 | 0.16751894 | 0.06221752 | -0.31865672 | 0.05092326 | 3.91E-10 |        |
| 19  | 41332357 | rs14332357 | T   | G   | 0.99346            | Genotyped | 0.31683491 | -0.25461956 | 0.04831658 | 4.78E-07  | 0.04879412 | 0.252908718 | 0.2494341  | 0.2672616  | 0.47657143 | 0.392350567 | 0.11716371 | 0.00177853 | 0.27381652  | 0.04381209 | 4.11E-10 |        |
| 19  | 41375083 | rs14375083 | T   | C   | 0.4076             | NA        | 0.605      | -0.38405347 | 0.072418   | 9.57E-07  | 0.70283333 | -0.42535155 | 0.15405492 | 0.00850699 | 0.78877876 | -0.372181   | 0.2315579  | 0.11582296 | -0.3900527  | 0.06306403 | 6.17E-10 |        |
| 19  | 41340397 | rs14340397 | T   | C   | 0.31426            | NA        | 0.01534906 | -1.41153146 | 0.30715975 | 2.98E-06  | 0.06682353 | -1.12431502 | 0.34513287 | 0.00227266 | 0.02832653 | -1.27958099 | 0.56070705 | 0.012817   | -0.23230078 | 0.02123202 | 1.50E-10 |        |
| 19  | 41340396 | rs14340396 | T   | C   | 0.51049            | NA        | 0.01597923 | -1.24109993 | 0.30945676 | 1.63E-05  | 0.24167993 | -1.08252598 | 0.34513287 | 0.00227266 | 0.02832653 | -1.27958099 | 0.56070705 | 0.012817   | -0.23230078 | 0.02123202 | 1.50E-10 |        |
| 19  | 41343926 | rs14343926 | T   | G   | 0.86024            | NA        | 0.01836085 | -1.16247542 | 0.27500544 | 1.04E-06  | 0.07655882 | -0.9339134  | 0.29196683 | 0.0023189  | 0.03016327 | -1.15104759 | 0.475982   | 0.0202405  | -0.17053788 | 0.178801   | 1.83E-09 |        |
| 19  | 41340579 | rs14340579 | T   | C   | 0.91794            | NA        | 0.01595991 | -1.37140344 | 0.30064761 | 1.88E-07  | 0.06908004 | -1.08947085 | 0.33411601 | 0.0022082  | 0.03142857 | -1.15478152 | 0.475982   | 0.0202405  | -0.17053788 | 0.178801   | 1.83E-09 |        |
| 19  | 41345989 | rs14345989 | T   | G   | 0.76141            | NA        | 0.3406533  | -0.25818996 | 0.05792523 | 1.38E-05  | 0.39158824 | -0.39921096 | 0.1283566  | 0.00335458 | 0.47079592 | -0.4261028  | 0.15479002 | 0.0088293  | -0.29709571 | 0.04998751 | 2.79E-09 |        |
| 19  | 41346099 | rs14346099 | T   | G   | 0.97572            | NA        | 0.48354953 | -0.23144692 | 0.05026541 | 7.29E-06  | 0.52969608 | -0.38457342 | 0.0590176  | 0.00011792 | 0.84743878 | -0.04167239 | 0.15753924 | 0.792737   | -0.25119043 | 0.0423507  | 2.99E-09 |        |
| 19  | 41375102 | rs14375102 | T   | C   | 0.39034            | NA        | 0.61949292 | -0.37477881 | 0.07493308 | 1.41E-06  | 0.17584314 | -0.48599612 | 0.15703938 | 0.00783279 | 0.68123679 | -0.35651367 | 0.2321739  | 0.31021232 | -0.3900527  | 0.06495282 | 3.87E-09 |        |
| 19  | 41332832 | rs14332832 | T   | G   | 0.87202            | NA        | 0.2796832  | -0.3280406  | 0.05954843 | 5.99E-05  | 0.27419608 | -0.1594942  | 0.16126674 | 0.2383265  | 0.2714486  | -0.5517246  | 0.1174672  | 3.14E-05   | -0.27849671 | 0.04820252 | 5.78E-09 |        |
| 19  | 41354062 | rs14354062 | T   | G   | 0.91541            | NA        | 0.3515897  | -0.24619973 | 0.05259588 | 4.13E-05  | 0.24167993 | -0.36892963 | 0.12453055 | 0.00500534 | 0.32162651 | -0.32206884 | 0.16606652 | 0.06011673 | -0.32014374 | 0.0410701  | 2.90E-10 |        |
| 19  | 41370132 | rs14370132 | T   | C   | 0.36082            | NA        | 0.01322406 | -1.93882594 | 0.34843685 | 0.0003607 | 0.05775459 | -1.21498523 | 0.2939004  | 0.00064194 | 0.0474749  | -0.4749325  | 0.3262719  | 0.1972233  | -1.81301    | 0.2058767  | 9.13E-09 |        |
| 19  | 41347668 | rs14347668 | T   | C   | 0.99334            | Genotyped | 0.48292922 | -0.21539391 | 0.05064195 | 3.80E-05  | 0.59312745 | -0.38007112 | 0.08986128 | 0.00010839 | 0.85112004 | -0.05630845 | 0.17347671 | 0.04270639 | -0.32014374 | 0.0410701  | 2.90E-10 |        |
| 19  | 41340323 | rs14340323 | T   | C   | 0.92286            | NA        | 0.27357783 | -0.24135721 | 0.05663032 | 3.10E-05  | 0.3529412  | -0.27346283 | 0.12324683 | 0.04485281 | 0.2045102  | -0.4644837  | 0.1321592  | 0.00111069 | -0.27561128 | 0.0484592  | 1.27E-08 |        |
| 19  | 41355195 | rs14355195 | T   | C   | 0.80432            | NA        | 0.28095528 | -0.27310274 | 0.05739272 | 3.70E-06  | 0.38108824 | -0.33622643 | 0.12684647 | 0.01127969 | 0.27955102 | -0.33923243 | 0.1699003  | 0.1762317  | -0.27951132 | 0.04997613 | 2.23E-08 |        |
| 19  | 41375030 | rs14375030 | T   | C   | 0.61719            | NA        | 0.04943396 | -0.52991791 | 0.12392822 | 2.92E-05  | 0.14822353 | -0.49665433 | 0.15196355 | 0.00212623 | 0.2823469  | -0.4164286  | 0.1621125  | 0.06217229 | -0.2954327  | 0.0940044  | 5.66E-08 |        |
| 19  | 41343842 | rs14343842 | T   | G   | 0.99604            | NA        | 0.47216557 | -0.20214319 | 0.05075728 | 8.79E-05  | 0.48965686 | -0.3931422  | 0.09877803 | 0.0002378  | 0.28521938 | -0.11942126 | 0.16240014 | 0.4654321  | -0.31245422 | 0.04431178 | 5.66E-08 |        |
| 19  | 41354062 | rs14354062 | T   | G   | 0.91541            | NA        | 0.3515897  | -0.24619973 | 0.05259588 | 4.13E-05  | 0.24167993 | -0.36892963 | 0.12453055 | 0.00500534 | 0.32162651 | -0.32206884 | 0.16606652 | 0.06011673 | -0.32014374 | 0.0410701  | 2.90E-10 |        |
| 19  | 41371100 | rs14371100 | T   | C   | 0.90177            | NA        | 0.1187736  | -           |            |           |            |             |            |            |            |             |            |            |             |            |          |        |

|    |          |               |     |   |         |           |            |             |             |            |             |             |            |             |             |             |             |             |             |            |          |
|----|----------|---------------|-----|---|---------|-----------|------------|-------------|-------------|------------|-------------|-------------|------------|-------------|-------------|-------------|-------------|-------------|-------------|------------|----------|
| 6  | 37100546 | 6.37100546    | G   | A | 0.88967 | NA        | 0.14717217 | -0.1971961  | 0.06459785  | 0.00257195 | 0.04156863  | -0.08026353 | 0.28191329 | 0.77726551  | 0.25636735  | -0.52643724 | 0.13007705  | 0.00023067  | -0.25497063 | 0.05667505 | 6.83E-06 |
| 19 | 41343199 | 19.41343199   | G   | A | 1.00124 | Genotyped | 0.05425708 | -0.38905217 | 0.09892224  | 0.00011516 | 0.23529412  | -0.19302437 | 0.12972188 | 0.14422481  | 0.10204082  | -0.33314973 | 0.16682182  | 0.05265598  | -0.31991602 | 0.07114788 | 6.91E-06 |
| 4  | 14337923 | 19.41337923   | G   | T | 1.00132 | Genotyped | 0.05424057 | -0.38917949 | 0.09896153  | 0.00011528 | 0.2352451   | -0.19307148 | 0.12978746 | 0.14432703  | 0.10204082  | -0.33314973 | 0.16682182  | 0.05265598  | -0.32006622 | 0.07117332 | 6.92E-06 |
| 22 | 26295699 | 22.26295699   | G   | A | 0.40615 | NA        | 0.02128302 | 0.299280424 | 0.34337862  | 0.38446957 | 0.00202941  | 2.55191534  | 0.92398087 | 0.00884753  | 0.13994988  | 0.82588996  | 0.19784727  | 0.00015696  | 0.375735801 | 0.16860051 | 3.98E-06 |
| 20 | 44865110 | 20.44865110   | T   | A | 0.68533 | NA        | 0.74200236 | -0.16346626 | 0.064643249 | 0.01219542 | 0.0077451   | 0.17688441  | 0.5958451  | 0.5046708   | 0.4217551   | -0.5092399  | 0.10447147  | 1.76E-05    | -0.2405984  | 0.0537171  | 6.75E-06 |
| 5  | 64004915 | 5.64004915    | G   | A | 0.60405 | NA        | 0.02803302 | 0.39855539  | 0.28490899  | 0.16349325 | 0.0280089   | 2.470915664 | 1.52338528 | 0.11435112  | 0.30067347  | 0.18957032  | 0.12507333  | 0.00016857  | 0.51067327  | 0.11418329 | 7.80E-06 |
| 2  | 1085637  | 10.217979674  | G   | C | 0.3155  | NA        | 0.18560377 | -0.47564864 | 0.10946547  | 2.20E-05   | 0.01459804  | 0.54912044  | 0.44387634 | 0.61620024  | -0.56181051 | 0.34324313  | 0.16236617  | 0.00016575  | 0.46165575  | 0.10326616 | 8.00E-06 |
| 20 | 51342745 | 20.51342745   | A   | G | 0.64026 | NA        | 0.24956604 | 0.30184128  | 0.05598763  | 7.39E-06   | 0.23385294  | -0.04031533 | 0.1295486  | 0.8403779   | 0.49395918  | -0.13467688 | 0.13282918  | 0.3161954   | -0.25454542 | 0.0567499  | 7.96E-06 |
| 5  | 171E-08  | 17.171E-08    | A   | G | 0.37768 | NA        | 0.02550943 | 0.745173282 | 0.13091066  | 0.02708266 | 0.09056863  | 0.43942211  | 0.25266387 | 0.0893378   | 0.06197959  | 0.831277673 | 0.23177186  | 0.0000216   | 0.15065769  | 0.976E-06  |          |
| 2  | 108E-08  | 10.217979674  | G   | C | 0.32187 | NA        | 0.18786321 | -0.46943046 | 0.10800374  | 2.20E-05   | 0.04092157  | 0.547953234 | 0.6948167  | 0.4352609   | 0.06217347  | -0.5468820  | 0.33819775  | 0.11732354  | -0.4546232  | 0.10179673 | 9.79E-06 |
| 5  | 78001483 | 5.78001483    | G   | T | 0.64716 | NA        | 0.1341533  | -0.39567558 | 0.08339536  | 0.00031527 | 0.2502451   | -0.34092693 | 0.1441329  | 0.0272055   | 0.05392857  | -0.30602676 | 0.32469913  | 0.35193999  | 0.37004596  | 0.828E-06  |          |
| 19 | 41367869 | 19.41367869   | G   | T | 0.97378 | NA        | 0.35929123 | -0.22202314 | 0.0511719   | 0.73E-05   | 0.04061968  | -0.21189595 | 0.11218959 | 0.06588995  | 0.6556124   | 0.030786084 | 0.16023925  | 0.84851578  | -0.24005816 | 0.04507129 | 6.85E-06 |
| 5  | 78001157 | 5.78001157    | G   | T | 0.49632 | NA        | 0.11254009 | -0.38294327 | 0.10230916  | 0.00036722 | 0.20844118  | -0.39127137 | 0.1733746  | 0.02928258  | 0.04014286  | -0.3806716  | 0.47519892  | 0.42789121  | -0.38494708 | 0.0866499  | 8.86E-06 |
| 5  | 78001356 | 5.78001356    | G   | A | 0.63487 | NA        | 0.13255896 | -0.30928307 | 0.0847098   | 0.00033221 | 0.24712745  | -0.34623235 | 0.1461213  | 0.02248762  | 0.05307143  | 0.02482757  | 0.33212594  | 0.32790363  | -0.1782751  | 0.017564   | 8.95E-06 |
| 3  | 172E-08  | 17.172E-08    | A   | A | 0.61856 | NA        | 0.33406604 | 0.25642226  | 0.06362884  | 7.89E-05   | 0.33936275  | 0.029614431 | 0.1629547  | 0.85666565  | 0.24420408  | 0.35636631  | 0.14825696  | 0.02095509  | 0.23423895  | 0.05305555 | 9.02E-06 |
| 6  | 139E-08  | 13.913717376  | A   | G | 0.98562 | Genotyped | 0.46426179 | 1.170549576 | 0.04178999  | 6.44E-05   | 0.46466667  | 0.189311172 | 0.09988545 | 0.06488166  | 0.7347551   | 0.056012167 | 0.12983983  | 0.66799824  | 0.163847546 | 0.03695584 | 9.27E-06 |
| 20 | 51343270 | 20.51343270   | A   | G | 0.64238 | NA        | 0.2499316  | -0.2988761  | 0.06561794  | 9.06E-06   | 0.22968277  | -0.05131729 | 0.214901   | 0.81242591  | 0.49543878  | -0.13401181 | 0.13290203  | 0.3194834   | -0.2515239  | 0.05674877 | 9.31E-06 |
| 6  | 70999533 | 6.70999533    | T   | C | 0.86252 | NA        | 0.14980896 | -0.19477971 | 0.06514722  | 0.00313623 | 0.04320588  | -0.0800913  | 0.2816457  | 0.77774704  | 0.27068367  | -0.15022052 | 0.12847023  | 0.00028971  | -0.25198395 | 0.0590519  | 9.52E-06 |
| 5  | 31874114 | 5.31874114    | G   | T | 0.83995 | NA        | 0.0190968  | 0.161232632 | 0.20332905  | 0.4287239  | 0.0140337   | -0.1321790  | 0.56502094 | 0.3817361   | 0.14683673  | 0.38885658  | 0.1303847   | 1.28E-05    | 0.476716295 | 0.1074289  | 9.66E-06 |
| 5  | 171E-08  | 17.171E-08    | A   | C | 0.45842 | NA        | 0.02242453 | 0.61837782  | 0.2845339   | 0.3380108  | 0.04041961  | 0.14897486  | 0.23506    | 0.08335336  | 0.06033673  | 0.81261053  | 0.22388126  | 0.00079641  | 0.62298368  | 0.14085437 | 9.74E-06 |
| 19 | 41362898 | 19.41362898   | T   | C | 0.86244 | NA        | 0.28373113 | -0.23277886 | 0.054373645 | 3.02E-05   | 0.210123529 | -0.15282585 | 0.1201125  | 0.21024674  | 0.3630102   | -0.12484161 | 0.048088367 | 0.49406688  | -0.1219317  | 0.04008165 | 9.74E-06 |
| 6  | 139E-08  | 13.9136197634 | A   | A | 0.48745 | NA        | 0.52771934 | 0.23396287  | 0.05970683  | 0.00012632 | 0.49672529  | 0.31966677  | 0.14226204 | 0.02980614  | 0.71843878  | 0.04333882  | 0.18795585  | 0.65607679  | 0.23583167  | 0.05283593 | 9.85E-06 |
| 10 | 63155127 | 10.63155127   | C   | T | 0.5255  | NA        | 0.04146698 | -0.37950638 | 0.17315772  | 0.02954013 | 0.05648039  | -0.25541082 | 0.32359059 | 0.43436865  | 0.20437755  | -0.0833699  | 0.16942557  | 0.0024039   | -0.50043187 | 0.11341778 | 1.02E-05 |
| 6  | 41537318 | 8.41537318    | G   | A | 0.60572 | NA        | 0.23164623 | -0.24929369 | 0.06792388  | 0.00030778 | 0.18441176  | -0.0946652  | 0.2010301  | 0.64014839  | 0.19726531  | -0.35467701 | 0.0640839   | 0.01193908  | -0.25898071 | 0.05806022 | 1.04E-05 |
| 6  | 7100247  | 6.7100247     | T   | C | 0.85705 | NA        | 0.15167217 | -0.39387613 | 0.06519062  | 0.00329705 | 0.03439216  | -0.06832372 | 0.2815813  | 0.76921316  | 0.27146939  | -0.50864145 | 0.12861072  | 0.00030473  | -0.25108047 | 0.0590506  | 1.04E-05 |
| 10 | 63153785 | 8.41537318    | A   | G | 0.60572 | NA        | 0.23164623 | -0.24929369 | 0.06792388  | 0.00030778 | 0.18441176  | -0.0946652  | 0.2010301  | 0.64014839  | 0.19726531  | -0.35467701 | 0.0640839   | 0.01193908  | -0.25898071 | 0.05806022 | 1.04E-05 |
| 20 | 7821516  | 5.7821516     | G   | T | 0.75604 | NA        | 0.01401415 | 0.035637324 | 0.2874499   | 0.01658112 | 0.1431862   | -0.29561781 | 0.17200167 | 0.09303462  | 0.18373747  | -0.6059223  | 0.121878    | 84E-05      | -0.3007987  | 0.09792432 | 1.09E-05 |
| 6  | 139E-08  | 13.9136197634 | A   | C | 0.72734 | NA        | 0.52183962 | 0.19100456  | 0.04876532  | 0.00012254 | 0.19420376  | 0.240830646 | 0.11490476 | 0.04221651  | 0.75872401  | 0.082260336 | 0.02916302  | 0.60941916  | -0.18009245 | 0.04321794 | 1.09E-05 |
| 6  | 139E-08  | 13.9136197634 | ATT | A | 0.82394 | NA        | 0.4958962  | 0.18508956  | 0.04575052  | 7.41E-05   | 0.45043137  | 0.216285759 | 0.11094316 | 0.05793158  | 0.71010204  | 0.048797827 | 0.13490159  | 0.72989895  | -0.17790745 | 0.04049766 | 1.12E-05 |
| 6  | 139E-08  | 13.91371286   | T   | T | 0.75971 | NA        | 0.50307374 | 0.189713214 | 0.04777818  | 9.95E-05   | 0.47469608  | 0.228159012 | 0.1181571  | 0.04773346  | 0.74066327  | 0.062313161 | 0.05304118  | 0.68675307  | 0.185534136 | 0.04224037 | 1.12E-05 |
| 3  | 38126167 | 3.8126167     | G   | T | 0.78031 | NA        | 0.07799057 | 0.340259438 | 0.09789507  | 0.00062288 | 0.08999196  | 0.48246503  | 0.1901279  | 0.2301857   | 0.3035714   | 0.694714315 | 0.4472079   | 0.12820408  | 0.375074282 | 0.08453264 | 1.14E-05 |
| 9  | 35942140 | 9.35942140    | G   | T | 0.97221 | NA        | 0.25357783 | 0.203460513 | 0.05282278  | 0.00014701 | 0.10545098  | 0.44778827  | 0.20524889 | 0.09727561  | 0.02188308  | 0.20270759  | 0.28119691  | 0.216790336 | 0.04940718  | 0.0394738  | 1.18E-05 |
| 10 | 1335     | 1.335E-08     | A   | C | 0.25906 | NA        | 0.13357906 | 0.26108216  | 0.05891567  | 0.00012632 | 0.49672529  | 0.31966677  | 0.14226204 | 0.02980614  | 0.71843878  | 0.04333882  | 0.18795585  | 0.65607679  | 0.23583167  | 0.05283593 | 9.85E-06 |
| 2  | 32867613 | 3.25676713    | G   | A | 0.37307 | NA        | 0.36903606 | -0.27958618 | 0.08059887  | 0.0003814  | 0.57904982  | -0.26348412 | 0.38435513 | 0.4970267   | 0.7562004   | -0.3971858  | 0.14788018  | 0.04008028  | -0.21959009 | 0.04942913 | 1.24E-05 |
| 6  | 139E-08  | 13.9136197634 | G   | A | 0.75162 | NA        | 0.42765802 | 0.19320716  | 0.047496625 | 7.90E-05   | 0.40440078  | 0.234421783 | 0.1131138  | 0.05218609  | 0.69914286  | 0.0458797   | 0.14548151  | 0.73556641  | -0.18009245 | 0.04321794 | 1.09E-05 |
| 19 | 41371763 | 19.41371763   | T   | A | 0.52521 | NA        | 0.01534906 | -1.00197792 | 0.27730795  | 0.00038127 | 0.39887255  | -0.10855632 | 0.65758080 | 0.079902    | 0.08013265  | -0.4884784  | 0.20600703  | 0.02371215  | -0.6958008  | 0.15876621 | 1.18E-05 |
| 6  | 171E-08  | 17.171E-08    | A   | G | 0.5276  | NA        | 0.23638195 | 0.29650686  | 0.07466194  | 9.99E-05   | 0.27710075  | 0.169672681 | 0.05451082 | 0.17115858  | 0.17626531  | 0.356550514 | 0.19127862  | 0.0696677   | 0.30173355  | 0.06877903 | 1.18E-05 |
| 20 | 52348097 | 20.52348097   | G   | A | 0.93055 | NA        | 0.64307311 | 0.197209155 | 0.0487984   | 7.54E-05   | 0.60842157  | 0.17667409  | 0.11508619 | 0.31225537  | 0.546       | 0.19555205  | 0.05058348  | 0.3650805   | 0.81121649  | 0.04139376 | 1.18E-05 |
| 6  | 41371964 | 9.41371964    | G   | A | 0.55561 | NA        | 0.0515013  | -1.00197792 | 0.27730795  | 0.00038127 | 0.39887255  | -0.10855632 | 0.65758080 | 0.079902    | 0.08013265  | -0.4884784  | 0.20600703  | 0.02371215  | -0.6958008  | 0.15876621 | 1.18E-05 |
| 2  | 85704082 | 2.85704082    | A   | C | 0.41615 | NA        | 0.25708008 | 0.26108216  | 0.05891567  | 0.00012632 | 0.49672529  | 0.31966677  | 0.14226204 | 0.02980614  | 0.71843878  | 0.04333882  | 0.18795585  | 0.65607679  | 0.23583167  | 0.05283593 | 9.85E-06 |
| 4  | 41533200 | 8.41533200    | G   | A | 0.76447 | NA        | 0.27086085 | -0.21036052 | 0.0564899   | 0.00045493 | 0.20983333  | -0.07951603 | 0.1754679  | 0.65276207  | 0.2184286   | -0.35882683 | 0.12075592  | 0.00663528  | -0.21959009 | 0.04942913 | 1.24E-05 |
| 9  | 35941789 | 9.35941789    | A   | C | 0.9517  | NA        | 0.24960163 | 0.207041389 | 0.05533362  | 0.00014805 | 0.10287255  | 0.10629353  | 0.12609523 | 0.068913265 | 0.20866412  | 0.20737594  | 0.32073607  | 0.1912791   | 0.05035878  | 0.127E-05  | 1.25E-05 |
| 8  | 41533514 | 8.41533514    | G   | A | 0.76362 | NA        | 0.2702755  | -0.20151427 | 0.05657366  | 0.00045861 | 0.20898309  | -0.08042927 | 0.17580594 | 0.64967571  | 0.21693877  | -0.35786705 | 0.12584296  | 0.00699224  | -0.21611718 | 0.04951028 | 1        |

|    |          |             |    |    |         |            |             |             |            |            |             |             |            |            |             |             |            |             |             |            |          |
|----|----------|-------------|----|----|---------|------------|-------------|-------------|------------|------------|-------------|-------------|------------|------------|-------------|-------------|------------|-------------|-------------|------------|----------|
| 13 | 75211586 | 13:75211586 | T  | C  | 0.32833 | 0.25327123 | 0.34782974  | 0.09174162  | 0.00019751 | 0.24960760 | 0.16729294  | 0.24245838  | 0.49939805 | 0.14695918 | 0.65253688  | 0.29145247  | 0.03079132 | 0.351326078 | 0.0823116   | 1.97E-05   |          |
| 3  | 172E-08  | 3:172316569 | G  | A  | 0.63091 | 0.33150943 | 0.24766463  | 0.06308024  | 0.00011819 | 0.34613725 | 0.031437581 | 0.16274083  | 0.84775249 | 0.2277551  | 0.306567496 | 0.14328173  | 0.03853969 | 0.231988242 | 0.05441054  | 2.01E-05   |          |
| 6  | 139E-08  | 6:139168529 | A  | C  | 0.65654 | 0.50113132 | 0.200527301 | 0.05188776  | 0.00014968 | 0.45039196 | 0.253836276 | 0.12049788  | 0.42783846 | 0.17686735 | 0.037972507 | 0.16265599  | 0.81660309 | 0.195217078 | 0.04478854  | 2.01E-05   |          |
| 20 | 53144591 | 20:53144591 | C  | T  | 0.65605 | 0.25113487 | 0.28300602  | 0.06543899  | 2.9E-05    | 0.21139216 | 0.08314658  | 0.0930396   | 0.50078571 | 0.13090544 | 0.238358    | 0.3303185   | 0.24092702 | 0.0565262   | 0.02E-05    |            |          |
| 17 | 36030219 | 17:36030219 | A  | G  | 0.32738 | 0.09045    | 0.50213216  | 0.15157332  | 0.0003986  | 0.1062745  | 0.7042389   | 0.1477911   | 0.11846656 | 0.4382509  | 0.7883648   | 0.5285408   | 0.2240184  | 0.202E-05   |             |            |          |
| 9  | 35949270 | 9:35949270  | A  | G  | 0.84217 | 0.24350472 | 0.22182085  | 0.05831202  | 0.00019544 | 0.09769608 | 0.466152527 | 0.2280266   | 0.4072673  | 0.08129592 | 0.190132726 | 0.22574205  | 0.40465226 | 0.23594511  | 0.054814    | 2.03E-05   |          |
| 9  | 35948775 | 9:35948775  | G  | A  | 0.85303 | 0.24542453 | 0.21920795  | 0.07574856  | 0.00019419 | 0.09586683 | 0.459917724 | 0.28253705  | 0.04759945 | 0.08179592 | 0.186897524 | 0.23259896  | 0.4081983  | 0.23126162  | 0.05426865  | 2.03E-05   |          |
| 10 | 41383556 | 10:41383556 | C  | T  | 0.98824 | GenotypeD  | 0.0530684   | 0.37684962  | 0.10364221 | 0.00035092 | 0.23107843  | 0.19591362  | 0.1356321  | 0.15603211 | 0.10204082  | 0.33314973  | 0.16628182 | 0.05255598  | 0.31664429  | 0.07384397 | 2.03E-05 |
| 10 | 63165574 | 10:63165574 | C  | T  | 0.78255 | NA         | 0.04315059  | 0.30320777  | 0.03887396 | 0.03016448 | 0.07422549  | 0.17291201  | 0.23252379 | 0.44351569 | 0.2779592   | 0.48476248  | 0.1264984  | 0.05004527  | 0.34796433  | 0.08638381 | 2.05E-05 |
| 12 | 49556906 | 12:49556906 | G  | C  | 0.71201 | NA         | 0.36082075  | 0.134579623 | 0.05776071 | 0.02709128 | 0.3666764   | 0.201893345 | 0.12955382 | 0.12664786 | 0.4624429   | 0.067755848 | 0.0962703  | 0.05004532  | 0.197013646 | 0.042624   | 2.06E-05 |
| 12 | 85959884 | 12:85959884 | T  | C  | 0.99544 | GenotypeD  | 0.08469911  | 0.19640049  | 0.08397297 | 0.02031294 | 0.38064706  | 0.35850941  | 0.10833961 | 0.09194971 | 0.33662655  | 0.21970918  | 0.12236413 | 0.0806278   | 0.24043455  | 0.0583415  | 2.06E-05 |
| 10 | 35505925 | 10:35505925 | C  | T  | 0.48446 | NA         | 0.10457783  | 0.62586023  | 0.00864221 | 0.00035062 | 0.03302743  | 0.18695708  | 0.33640987 | 0.00102775 | 0.02787571  | 0.13097869  | 0.37281705 | 0.72719094  | 0.3906408   | 0.2240184  | 2.06E-05 |
| 10 | 36505827 | 10:36505827 | C  | T  | 0.48634 | NA         | 0.10441308  | 0.3584057   | 0.08505111 | 0.00035    | 0.0308824   | 0.18483271  | 0.35372721 | 0.00102917 | 0.07304082  | 0.13078936  | 0.37048205 | 0.72925254  | 0.3900581   | 0.0916228  | 2.08E-05 |
| 20 | 52347885 | 20:52347885 | T  | A  | 0.91485 | NA         | 0.65091274  | 0.19639625  | 0.04292665 | 0.0445     | 0.65136275  | 0.150024572 | 0.11660167 | 0.20526609 | 0.56076311  | 0.112806112 | 0.2952019  | 0.2921019   | 0.17435251  | 0.0417821  | 2.08E-05 |
| 4  | 1.1E-08  | 4:109772273 | C  | G  | 0.32854 | NA         | 0.05591038  | 0.50999862  | 0.17018927 | 0.00062984 | 0.06617647  | 0.30865305  | 0.39066863 | 0.43392888 | 0.11058163  | 0.75406619  | 0.30242658 | 0.01689784  | 0.58969659  | 0.13866033 | 2.11E-05 |
| 9  | 35946275 | 9:35946275  | G  | A  | 0.91873 | NA         | 0.25689349  | 0.20739655  | 0.05454023 | 0.00018933 | 0.13089216  | 0.426809027 | 0.11083333 | 0.04892857 | 0.164094929 | 0.21060945  | 0.44048081 | 0.21779897  | 0.05121697  | 2.12E-05   |          |
| 10 | 63169896 | 10:63169896 | T  | C  | 0.84246 | NA         | 0.04262736  | 0.2905456   | 0.13365043 | 0.0308679  | 0.16527665  | 0.21506603  | 0.46494665 | 0.28253061 | 0.4638993   | 0.15125825  | 0.00045919 | 0.35286079  | 0.08295619  | 2.12E-05   |          |
| 6  | 1.71E-08 | 6:157075289 | T  | G  | 0.45352 | NA         | 0.04505896  | 0.51522628  | 0.21425768 | 0.01702055 | 0.13045098  | 0.34284175  | 0.19416891 | 0.0846136  | 0.09605102  | 0.56397139  | 0.1794693  | 0.03015082  | 0.47724285  | 0.11225715 | 2.12E-05 |
| 10 | 63169148 | 10:63169148 | C  | T  | 0.83673 | NA         | 0.05251223  | 0.20217196  | 0.13427897 | 0.00397794 | 0.07456471  | 0.1660806   | 0.2169568  | 0.4656884  | 0.2810527   | 0.46676645  | 0.12220203 | 0.00045664  | 0.35451725  | 0.08309138 | 2.16E-05 |
| 19 | 1710585  | 19:1710585  | A  | TA | 0.41035 | NA         | 0.29150472  | 0.27603693  | 0.07984377 | 0.0066477  | 0.18620588  | 0.214693572 | 0.2447492  | 0.38339    | 0.2092575   | 0.447830714 | 0.17936165 | 0.01674862  | 0.29712619  | 0.0690477  | 2.13E-05 |
| 13 | 75211204 | 13:75211204 | TA | A  | 0.31391 | NA         | 0.23421226  | 0.36941698  | 0.06755002 | 0.00017862 | 0.32091961  | 0.17057746  | 0.24743537 | 0.4943743  | 0.13447959  | 0.68070521  | 0.31600691 | 0.0375891   | 0.17435251  | 0.0668867  | 2.14E-05 |
| 12 | 1.14E-08 | 12:11402845 | G  | A  | 0.30832 | NA         | 0.03297555  | 0.29275559  | 0.23162166 | 8.42E-05   | 0.01241176  | 0.40967369  | 0.14838708 | 0.02178571 | 0.76519451  | 0.22140081  | 0.29521257 | 0.93245278  | 0.1987969   | 2.15E-05   |          |
| 9  | 35948251 | 9:35948251  | AT | C  | 0.86031 | NA         | 0.24870991  | 0.21653977  | 0.05712732 | 0.0001982  | 0.10218627  | 0.45122944  | 0.2232082  | 0.0830102  | 0.18711311  | 0.7202665   | 0.15451841 | 0.2802673   | 0.05368464  | 2.16E-05   |          |
| 20 | 5486350  | 20:5486350  | G  | C  | 0.7134  | NA         | 0.17483019  | 0.14525907  | 0.05840648 | 0.01473105 | 0.8919902   | 0.14766902  | 0.1503604  | 0.49065063 | 0.01413265  | 0.305092    | 0.14037805 | 0.1974085   | 0.04982785  | 2.18E-05   |          |
| 1  | 7873570  | 1:7873570   | G  | A  | 0.34898 | NA         | 0.01159906  | 0.4175443   | 0.15803628 | 0.02120234 | 0.10014678  | 1.40774933  | 4.9622191  | 0.7780391  | 0.06513627  | 0.50427442  | 0.2935439  | 6.82E-05    | 0.10842306  | 0.2505746  | 2.20E-05 |
| 9  | 35949286 | 9:35949286  | A  | G  | 0.83952 | NA         | 0.25940794  | 0.21139216  | 0.0001982  | 0.084046   | 0.34865219  | 0.16791353  | 0.0939285  | 0.15188332 | 0.21846661  | 0.093958    | 0.0001212  | 0.0001212   | 0.0001212   | 0.0001212  | 2.20E-05 |
| 9  | 35949286 | 9:35949286  | A  | G  | 0.84277 | NA         | 0.24324764  | 0.221518592 | 0.05837334 | 0.00019499 | 0.09578824  | 0.46670381  | 0.22825357 | 0.04718994 | 0.07975551  | 0.16979572  | 0.0631267  | 0.45607763  | 0.23222113  | 0.05485616 | 2.23E-05 |
| 9  | 35949775 | 9:35949775  | C  | T  | 0.83206 | NA         | 0.24313610  | 0.22366487  | 0.05894997 | 0.00019547 | 0.07421805  | 0.14721084  | 0.2310447  | 0.07873266 | 0.07871429  | 0.172670059 | 0.22875176 | 0.45241946  | 0.23405154  | 0.0545006  | 2.23E-05 |
| 9  | 35948867 | 9:35948867  | T  | G  | 0.85254 | NA         | 0.2496462   | 0.21965968  | 0.05786603 | 0.00019364 | 0.09839216  | 0.46113919  | 0.2529283  | 0.04755941 | 0.07970408  | 0.16691317  | 0.22368011 | 0.459741    | 0.23052444  | 0.05436572 | 2.23E-05 |
| 9  | 35949202 | 9:35949202  | T  | G  | 0.84493 | NA         | 0.24362028  | 0.22109113  | 0.05825908 | 0.00019489 | 0.09776471  | 0.465594445 | 0.2275679  | 0.04723018 | 0.07937755  | 0.169113072 | 0.22516771 | 0.45701628  | 0.23245297  | 0.05474801 | 2.23E-05 |
| 9  | 35949312 | 9:35949312  | A  | G  | 0.84169 | NA         | 0.24350891  | 0.221704708 | 0.05842924 | 0.00019529 | 0.0975      | 0.467087782 | 0.2285034  | 0.0724277  | 0.07921429  | 0.170038469 | 0.22697133 | 0.4580484   | 0.23281780  | 0.05490854 | 2.23E-05 |
| 9  | 35949555 | 9:35949555  | A  | G  | 0.8374  | NA         | 0.24288774  | 0.22254253  | 0.0586304  | 0.00019878 | 0.09137275  | 0.46938615  | 0.2957786  | 0.04720168 | 0.07897959  | 0.17147478  | 0.22691178 | 0.4538199   | 0.232758106 | 0.05513044 | 2.23E-05 |
| 9  | 35949555 | 9:35949555  | A  | G  | 0.83952 | NA         | 0.25940794  | 0.21139216  | 0.0001982  | 0.084046   | 0.34865219  | 0.16791353  | 0.0939285  | 0.15188332 | 0.21846661  | 0.093958    | 0.0001212  | 0.0001212   | 0.0001212   | 0.0001212  | 2.23E-05 |
| 9  | 35949555 | 9:35949555  | A  | G  | 0.84277 | NA         | 0.24324764  | 0.221518592 | 0.05837334 | 0.00019499 | 0.09578824  | 0.46670381  | 0.22825357 | 0.04718994 | 0.07975551  | 0.16979572  | 0.0631267  | 0.45607763  | 0.23222113  | 0.05485616 | 2.23E-05 |
| 19 | 1702768  | 19:1702768  | T  | G  | 0.49096 | NA         | 0.25665802  | 0.251368005 | 0.05894997 | 0.00019547 | 0.07421805  | 0.14721084  | 0.2310447  | 0.07873266 | 0.07871429  | 0.172670059 | 0.22875176 | 0.45241946  | 0.23405154  | 0.0545006  | 2.23E-05 |
| 9  | 35949346 | 9:35949346  | T  | G  | 0.84042 | NA         | 0.242875    | 0.22186678  | 0.05849262 | 0.00019605 | 0.09743137  | 0.467573912 | 0.2287902  | 0.04729026 | 0.07920408  | 0.170073962 | 0.22680692 | 0.45629004  | 0.23006655  | 0.04969922 | 2.25E-05 |
| 9  | 35949346 | 9:35949346  | T  | G  | 0.83198 | NA         | 0.09580189  | 0.45380775  | 0.12814329 | 0.00049364 | 0.07558824  | 0.46357257  | 0.23079664 | 0.03077865 | 0.0430102   | 0.35205975  | 0.15662954 | 0.0956232   | 0.05405446  | 0.1066549  | 2.25E-05 |
| 6  | 1.39E-08 | 6:139172619 | CT | C  | 0.37329 | NA         | 0.2635283   | 0.27971196  | 0.08043659 | 0.00061915 | 0.17204902  | 0.25888228  | 0.40551512 | 0.09858714 | 0.4694991   | 0.2794118   | 0.10087325 | 0.31488807  | 0.07403939  | 2.26E-05   |          |
| 6  | 1.24E-08 | 6:12397491  | T  | A  | 0.63425 | NA         | 0.0205684   | 0.71641865  | 0.18738367 | 0.00017451 | 0.0114902   | 0.20365104  | 1.84745074 | 0.1935674  | 0.09623999  | 0.5442883   | 0.0808817  | 0.31766004  | 0.1763299   | 2.26E-05   |          |
| 9  | 35949594 | 9:35949594  | A  | G  | 0.83952 | NA         | 0.25940794  | 0.21139216  | 0.0001982  | 0.084046   | 0.34865219  | 0.16791353  | 0.0939285  | 0.15188332 | 0.21846661  | 0.093958    | 0.0001212  | 0.0001212   | 0.0001212   | 0.0001212  | 2.26E-05 |
| 9  | 35949286 | 9:35949286  | A  | G  | 0.84277 | NA         | 0.24324764  | 0.221518592 | 0.05837334 | 0.00019499 | 0.09578824  | 0.46670381  | 0.22825357 | 0.04718994 | 0.07975551  | 0.16979572  | 0.0631267  | 0.45607763  | 0.23222113  | 0.05485616 | 2.23E-05 |
| 9  | 35949775 | 9:35949775  | C  | T  | 0.83206 | NA         | 0.24313610  | 0.22366487  | 0.05894997 | 0.00019547 | 0.07421805  | 0.14721084  | 0.2310447  | 0.07873266 | 0.07871429  | 0.172670059 | 0.22875176 | 0.45241946  | 0.23405154  | 0.0545006  | 2.23E-05 |
| 9  | 35948867 | 9:35948867  | T  | G  | 0.85254 | NA         | 0.2496462   | 0.21965968  | 0.05786603 | 0.00019364 | 0.09839216  | 0.46113919  | 0.2529283  | 0.04755941 | 0.07970408  | 0.16691317  | 0.22368011 | 0.459741    | 0.23052444  | 0.05436572 | 2.23E-05 |
| 9  | 35949202 | 9:35949202  | T  | G  | 0.84493 | NA         | 0.24362028  | 0.22109113  | 0.05825908 | 0.00019489 | 0.09776471  | 0.465594    |            |            |             |             |            |             |             |            |          |

|    |          |              |     |    |         |           |            |             |            |            |             |             |            |            |             |             |            |            |             |            |          |
|----|----------|--------------|-----|----|---------|-----------|------------|-------------|------------|------------|-------------|-------------|------------|------------|-------------|-------------|------------|------------|-------------|------------|----------|
| 12 | 1.3e-08  | 12:129796621 | T   | G  | 0.97777 | NA        | 0.13111792 | -0.256397   | 0.06579863 | 0.0001324  | 0.42344118  | -0.1639532  | 0.10349046 | 0.12664204 | 0.41918367  | -0.11356523 | 0.12665775 | 0.37528082 | -0.21104983 | 0.05085391 | 3.32e-05 |
| 15 | 65682721 | 15:65682721  | C   | T  | 0.34156 | NA        | 0.01141745 | 1.064395339 | 0.70036577 | 0.1301246  | 0.01218627  | -2.76262939 | 2.92015797 | 0.34953199 | 0.07767347  | 0.939024637 | 0.23734579 | 0.0003032  | 0.930058083 | 0.22412551 | 3.33e-05 |
| 3  | 1.72e-08 | 3:172348021  | A   | A  | 0.42468 | NA        | 0.51179953 | 0.250520841 | 0.70401868 | 0.0086368  | 0.480480399 | 0.15851022  | 0.16716542 | 0.34843997 | 0.5040241   | 0.392317833 | 0.16125257 | 0.01952261 | 0.25892921  | 0.06245059 | 3.34e-05 |
| 20 | 53149411 | 20:53149411  | C   | A  | 0.66632 | NA        | 0.25239387 | -0.7320264  | 0.06528527 | 4.25e-05   | 0.20558824  | -0.0970444  | 0.2605612  | 0.64052722 | 0.50438776  | -0.1275568  | 0.13626236 | 0.24376623 | -0.23377671 | 0.05634585 | 3.34e-05 |
| 12 | 1.3e-08  | 12:129795862 | G   | T  | 0.99896 | Genotyped | 0.12977878 | -0.23638126 | 0.05518811 | 0.0001305  | 0.42339216  | -0.1621364  | 0.1027461  | 0.3203663  | 0.4142551   | -0.1133421  | 0.12521157 | 0.3709376  | -0.20882322 | 0.0533602  | 3.34e-05 |
| 12 | 1.3e-08  | 12:129796484 | A   | G  | 0.98186 | NA        | 0.13091981 | -0.25570287 | 0.06566521 | 0.0001333  | 0.4235      | -0.16361285 | 0.10328569 | 0.12067722 | 0.4190361   | -0.11336298 | 0.1263524  | 0.37498235 | -0.21054379 | 0.05074825 | 3.34e-05 |
| 1  | 2.27e-08 | 1:22704672   | C   | G  | 0.40649 | NA        | 0.64141038 | 0.29683267  | 0.07864226 | 0.00015069 | 0.171591176 | 0.398265301 | 0.2058261  | 0.05974844 | 0.62904082  | 0.045564418 | 0.22019739 | 0.83764283 | 0.28392954  | 0.06844686 | 3.35e-05 |
| 4  | 1.26e-08 | 4:12585347   | C   | C  | 0.57705 | NA        | 0.90729453 | 0.360172865 | 0.09861673 | 0.00033081 | 0.82759804  | 0.08496778  | 0.16927301 | 0.61203397 | 0.82869388  | 0.577004473 | 0.2171244  | 0.01125429 | 0.32902182  | 0.07932086 | 3.35e-05 |
| 12 | 1.3e-08  | 12:129792066 | A   | C  | 0.85936 | NA        | 0.13305896 | -0.26589023 | 0.06943226 | 0.00017107 | 0.41042157  | -0.17905803 | 0.1178246  | 0.11668575 | 0.38135714  | -0.13341429 | 0.1148512  | 0.35136402 | -0.25885189 | 0.04543974 | 3.39e-05 |
| 19 | 3180331  | 19:3180331   | T   | A  | 0.3137  | NA        | 0.22898821 | 0.416289905 | 0.09062942 | 7.65e-06   | 0.37506883  | 0.0058814   | 0.2873103  | 0.98376484 | 0.29270408  | 0.071649435 | 0.1883663  | 0.7064288  | 0.3256039   | 0.0785851  | 3.39e-05 |
| 19 | 4316556  | 19:4316556   | T   | A  | 0.99514 | Genotyped | 0.23735142 | 0.21205705  | 0.05518964 | 0.00016297 | 0.4049      | 0.25718257  | 0.2400872  | 0.26740248 | 0.1008265   | 0.201273754 | 0.18516534 | 0.2642860  | 0.2313844   | 0.0517489  | 3.41e-05 |
| 7  | 6841991  | 7:6841991    | T   | A  | 0.85542 | NA        | 0.35364858 | -0.25127215 | 0.05253901 | 1.43e-06   | 0.38073451  | 0.007976385 | 0.1227008  | 0.9487689  | 0.58662004  | 0.052145907 | 0.12634439 | 0.68201195 | -0.1812879  | 0.04382497 | 3.41e-05 |
| 19 | 4317545  | 19:4317545   | T   | A  | 0.52124 | NA        | 0.41580896 | -0.15324247 | 0.05517257 | 0.0165542  | 0.21527025  | -0.39710083 | 0.13321831 | 0.60476596 | 0.46046939  | -0.39459398 | 0.150323   | 0.01212424 | -0.22592602 | 0.05451166 | 3.45e-05 |
| 20 | 52351209 | 20:52351209  | A   | G  | 0.93483 | NA        | 0.56120991 | 0.205006758 | 0.0472756  | 2.24e-05   | 0.4682005   | 0.176425203 | 0.14111884 | 0.27217347 | -0.05583149 | 0.11808669  | 0.6409531  | 0.17024974 | 0.04111308  | 0.3466     | 3.45e-05 |
| 3  | 21603317 | 3:21603317   | AAC | A  | 0.64237 | NA        | 0.50424292 | 0.219599182 | 0.05794195 | 0.00019856 | 0.58754902  | 0.162989883 | 0.16513473 | 0.32928891 | 0.762       | 0.27810143  | 0.19602657 | 0.16373384 | 0.21860439  | 0.05266398 | 3.46e-05 |
| 3  | 36508889 | 3:36508889   | C   | T  | 0.34582 | NA        | 0.14789151 | -0.33754711 | 0.10344261 | 0.00129281 | 0.07621569  | -1.27206887 | 0.30191509 | 0.00013037 | 0.13770408  | 0.085800093 | 0.20805652 | 0.7493623  | -0.38497778 | 0.02927529 | 3.46e-05 |
| 3  | 21602351 | 3:21602351   | C   | T  | 0.64153 | NA        | 0.50433491 | 0.21968675  | 0.09798323 | 0.00019945 | 0.58741176  | 0.163128182 | 0.16521297 | 0.32911014 | 0.76188776  | 0.27835516  | 0.19610357 | 0.16325018 | 0.21168904  | 0.052699   | 3.47e-05 |
| 10 | 36508984 | 3:36508984   | T   | A  | 0.34508 | NA        | 0.1481451  | -0.33729667 | 0.10349139 | 0.00130994 | 0.0765      | -1.27292567 | 0.30174129 | 0.00012825 | 0.13782653  | 0.086150324 | 0.2983651  | 0.17429358 | -0.3850628  | 0.09301594 | 3.48e-05 |
| 10 | 36502025 | 10:36502025  | T   | A  | 0.47995 | NA        | 0.1187783  | -0.32489357 | 0.09663511 | 0.000484   | 0.38543317  | -1.15335612 | 0.1913803  | 0.00078679 | 0.10637755  | 0.06773095  | 0.27744    | 0.80837947 | -0.3631219  | 0.08774055 | 3.48e-05 |
| 12 | 1.3e-08  | 12:129804587 | G   | C  | 0.83247 | NA        | 0.1386048  | -0.2788578  | 0.07089687 | 0.00011488 | 0.41893137  | -0.1753004  | 0.1111974  | 0.12235546 | 0.42322449  | -0.11031386 | 0.14169315 | 0.44083186 | -0.22800138 | 0.0507877  | 3.48e-05 |
| 19 | 41362791 | 19:41362791  | C   | CT | 0.47148 | NA        | 0.19195175 | -0.29534172 | 0.14844555 | 0.00057792 | 0.20430317  | -0.21824598 | 0.1823461  | 0.12805167 | 0.25058163  | -0.59056699 | 0.26875289 | 0.0338414  | -0.30494754 | 0.0736691  | 3.51e-05 |
| 9  | 1.08e-08 | 9:107632401  | CAG | C  | 0.99169 | NA        | 0.20503538 | -0.23562304 | 0.0521116  | 1.55e-05   | 0.09807843  | 0.138091936 | 0.24049858 | 0.05403602 | 0.13588776  | -0.1136187  | 0.1604945  | 0.4830943  | -0.20282501 | 0.04904001 | 3.54e-05 |
| 10 | 36502048 | 10:36502048  | CT  | C  | 0.48178 | NA        | 0.11850472 | -0.34279025 | 0.09656861 | 0.0004792  | 0.03507843  | -1.15308495 | 0.19354713 | 0.00081317 | 0.10609184  | 0.08601669  | 0.27709006 | 0.80711383 | -0.3626847  | 0.08878874 | 3.54e-05 |
| 3  | 21602714 | 3:21602714   | T   | G  | 0.63695 | NA        | 0.50471226 | 0.220155372 | 0.05821208 | 0.0002644  | 0.56883333  | 0.164059393 | 0.16549013 | 0.76112024 | 0.27930439  | 0.176110204 | 0.27930439 | 0.16642191 | 0.0528844   | 3.54e-05   |          |
| 19 | 43771    | 19:43771     | T   | A  | 0.43771 | NA        | 0.31664623 | 0.25981643  | 0.07404016 | 0.0000649  | 0.20697509  | 0.25099572  | 0.19451003 | 0.2529707  | 0.24502041  | 0.328443425 | 0.16423478 | 0.0524305  | 0.266732353 | 0.05451537 | 3.56e-05 |
| 10 | 3650125  | 10:3650125   | G   | A  | 0.50125 | Genotyped | 0.20642179 | 0.20299484  | 0.05202105 | 0.00012051 | 0.45681033  | 0.12692304  | 0.13526466 | 0.1562122  | 0.39779025  | 0.2282787   | 0.16287475 | 0.16287475 | 0.05202105  | 0.05202105 | 3.56e-05 |
| 20 | 52351608 | 20:52351608  | C   | A  | 0.9208  | NA        | 0.55788915 | 0.206909611 | 0.04755924 | 2.31e-05   | 0.48287275  | 0.17610219  | 0.1180278  | 0.14292315 | 0.28688888  | 0.058131    | 0.12082122 | 0.63259177 | -0.17127535 | 0.04143969 | 3.57e-05 |
| 6  | 1.39e-08 | 6:13975465   | A   | G  | 0.52045 | NA        | 0.54159991 | 0.215224053 | 0.07518724 | 0.00021929 | 0.40647665  | 0.26560562  | 0.16403993 | 0.07513586 | 0.77037755  | 0.078134224 | 0.28314224 | 0.17121415 | 0.13273608  | 0.05162032 | 3.57e-05 |
| 2  | 85717355 | 2:85717355   | T   | C  | 0.55009 | NA        | 0.06665566 | 0.381252161 | 0.13262241 | 0.00049431 | 0.08548039  | 0.452223771 | 0.30495158 | 0.14555688 | 0.12881633  | 0.052062283 | 0.1975762  | 0.10276673 | 0.42782073  | 0.1034260  | 3.59e-05 |
| 4  | 27788238 | 2:47788238   | C   | G  | 0.46848 | NA        | 0.09318632 | -0.47962357 | 0.10300343 | 0.348e-05  | 0.1749902   | -0.15673663 | 0.24275957 | 0.52202093 | 0.05967347  | -0.21975062 | 0.3020902  | 0.0417038  | -0.40114131 | 0.09707595 | 3.59e-05 |
| 3  | 1.55e-08 | 3:15223349   | C   | C  | 0.35141 | NA        | 0.21223349 | -0.55590112 | 0.12401934 | 1.23e-05   | 0.08282353  | -0.20822336 | 0.1773653  | 0.58832064 | 0.1772651   | -0.1092404  | 0.21744638 | 0.11655577 | -0.4274161  | 0.10347395 | 3.62e-05 |
| 3  | 75213672 | 13:75213672  | T   | A  | 0.39001 | NA        | 0.302153   | 0.28542699  | 0.0790151  | 0.00038209 | 0.27554902  | 0.138971657 | 0.2393207  | 0.38319687 | 0.1807449   | 0.547912203 | 0.2394535  | 0.02742302 | 0.29885419  | 0.07114425 | 3.62e-05 |
| 3  | 21602460 | 3:21602460   | T   | A  | 0.9208  | NA        | 0.55788915 | 0.206909611 | 0.04755924 | 2.31e-05   | 0.48287275  | 0.17610219  | 0.1180278  | 0.14292315 | 0.28688888  | 0.058131    | 0.12082122 | 0.63259177 | -0.17127535 | 0.04143969 | 3.57e-05 |
| 20 | 52351608 | 20:52351608  | C   | A  | 0.9208  | NA        | 0.55788915 | 0.206909611 | 0.04755924 | 2.31e-05   | 0.48287275  | 0.17610219  | 0.1180278  | 0.14292315 | 0.28688888  | 0.058131    | 0.12082122 | 0.63259177 | -0.17127535 | 0.04143969 | 3.57e-05 |
| 6  | 1.39e-08 | 6:13975465   | A   | G  | 0.52045 | NA        | 0.54159991 | 0.215224053 | 0.07518724 | 0.00021929 | 0.40647665  | 0.26560562  | 0.16403993 | 0.07513586 | 0.77037755  | 0.078134224 | 0.28314224 | 0.17121415 | 0.13273608  | 0.05162032 | 3.57e-05 |
| 2  | 85717355 | 2:85717355   | T   | C  | 0.55009 | NA        | 0.06665566 | 0.381252161 | 0.13262241 | 0.00049431 | 0.08548039  | 0.452223771 | 0.30495158 | 0.14555688 | 0.12881633  | 0.052062283 | 0.1975762  | 0.10276673 | 0.42782073  | 0.1034260  | 3.59e-05 |
| 4  | 27788238 | 2:47788238   | C   | G  | 0.46848 | NA        | 0.09318632 | -0.47962357 | 0.10300343 | 0.348e-05  | 0.1749902   | -0.15673663 | 0.24275957 | 0.52202093 | 0.05967347  | -0.21975062 | 0.3020902  | 0.0417038  | -0.40114131 | 0.09707595 | 3.59e-05 |
| 3  | 1.55e-08 | 3:15223349   | C   | C  | 0.35141 | NA        | 0.21223349 | -0.55590112 | 0.12401934 | 1.23e-05   | 0.08282353  | -0.20822336 | 0.1773653  | 0.58832064 | 0.1772651   | -0.1092404  | 0.21744638 | 0.11655577 | -0.4274161  | 0.10347395 | 3.62e-05 |
| 3  | 75213672 | 13:75213672  | T   | A  | 0.39001 | NA        | 0.302153   | 0.28542699  | 0.0790151  | 0.00038209 | 0.27554902  | 0.138971657 | 0.2393207  | 0.38319687 | 0.1807449   | 0.547912203 | 0.2394535  | 0.02742302 | 0.29885419  | 0.07114425 | 3.62e-05 |
| 3  | 21602460 | 3:21602460   | T   | A  | 0.9208  | NA        | 0.55788915 | 0.206909611 | 0.04755924 | 2.31e-05   | 0.48287275  | 0.17610219  | 0.1180278  | 0.14292315 | 0.28688888  | 0.058131    | 0.12082122 | 0.63259177 | -0.17127535 | 0.04143969 | 3.57e-05 |
| 20 | 52351608 | 20:52351608  | C   | A  | 0.9208  | NA        | 0.55788915 | 0.206909611 | 0.04755924 | 2.31e-05   | 0.48287275  | 0.17610219  | 0.1180278  | 0.14292315 | 0.28688888  | 0.058131    | 0.12082122 | 0.63259177 | -0.17127535 | 0.04143969 | 3.57e-05 |
| 6  | 1.39e-08 | 6:13975465   | A   | G  | 0.52045 | NA        | 0.54159991 | 0.215224053 | 0.07518724 | 0.00021929 | 0.40647665  | 0.26560562  | 0.16403993 | 0.07513586 | 0.77037755  | 0.078134224 | 0.28314224 | 0.17121415 | 0.13273608  | 0.05162032 | 3.57e-05 |
| 2  | 85717355 | 2:85717355   | T   | C  | 0.55009 | NA        | 0.06665566 | 0.381252161 | 0.13262241 | 0.00049431 | 0.08548039  | 0.452223771 | 0.30495158 | 0.14555688 | 0.12881633  | 0.052062283 | 0.1975762  | 0.10276673 | 0.42782073  | 0.1034260  |          |
